# Supplementary material for: Improving the activity of CoxP nanoparticles for the electrochemical hydrogen evolution by hydrogenation
Source: Royal Society of Chemistry journal article supplement (doi:10.1039/c6se00058d), 2017-01-01
Supplement: c6se00058d1.pdf [file c6se00058d1.pdf]

## Supporting information

### Improving the hydrogen evolution activity of Co<sub>x</sub>P nanoparticles by hydrogenation

Lihong Tian,<sup>a,b</sup> James Murowchick,<sup>c</sup> Xiaobo Chen<sup>a,\*</sup>

<sup>1</sup> Department of Chemistry, University of Missouri – Kansas City, Kansas City, Missouri, 64110, USA. E-mail: chenxiaobo@umkc.edu

<sup>2</sup> Hubei Collaborative Innovation Center for Advanced Organochemical Materials, Ministry of Education Key Laboratory for the Synthesis and Applications of Organic Functional Molecules, Hubei University, Wuhan 430062, PR China

<sup>c</sup> Department of Geosciences, University of Missouri – Kansas City, Kansas City, Missouri, 64110, USA

Experimental details, Figure S1-S6 and Table S1

## **Experimental section**

### **Catalyst preparation**

In a typical process, 1.19 g of Co (OH)<sub>2</sub> and 1.33 g of NaH<sub>2</sub>PO<sub>2</sub>·H<sub>2</sub>O was grinded in a agate mortar, then the obtained mixture was calcinated in argon atmosphere at 250–400 °C for 3h. The collected product was dispersed ultrasonically into a 2.0 M HCl solution and kept on stirring for 12 h. A black powder was obtained after washed by deionized water for several times and dried in an oven at 100 °C overnight. Hydrogenation was performed on all as-prepared samples at 350 °C for 6h under pure hydrogen environments.

### **Characterizations**

The crystal structure of products was characterized by a Rigaku Miniflex X-ray Diffractometer (XRD) with a CuK $\alpha$  ( $\lambda$ = 0.15418 nm) radiation source. The morphologies and structure of the samples were observed by transmission electron microscopy (TEM, FEI Tecnai F20 STEM) with the electron accelerating voltage of 200 kV. A small amount of powder sample dispersed in ethanol was dropped onto a thin holey carbon film, and dried overnight before TEM measurement. XPS data were collected using a Kratos Axis 165 X-ray photoelectron spectrometer with an Al/Mg dual-anode X-ray source, using a photon beam of 1486.6 eV.

All electrochemical measurements were carried out in a three-electrode system at room temperature. A Pt wire, an Ag/AgCl electrode, and 0.5 M H<sub>2</sub>SO<sub>4</sub> were used as the counter electrode, reference electrode, and electrolyte, respectively. The working electrode was prepared by coating a mixture slurry of catalyst powder, carbon black

and polyvinylidene difluoride (weight ratio = 8:1:1) in 0.05 mL N-methyl-2-pyrrolidone solution on a titanium foil. The mass loading is about  $0.7 \text{ mg cm}^{-2}$  (catalyst loading  $\approx 0.56 \text{ mg cm}^{-2}$ ). Linear sweep voltammetry (LSV) at a scan rate of  $5 \text{ mV s}^{-1}$  and electrochemical impedance spectroscopy (EIS) analysis using a 10 mV amplitude AC signal over a frequency range from 100 kHz to 10 mHz were performed on an electrochemical workstation. The commercial Pt/C was used as the state-of-the-art HER catalyst for comparison. All polarization curves were iR-corrected for an ohmic drop obtained from Nyquist plot. Reversible hydrogen electrode (RHE) calibration was carried out using Ag/AgCl as the reference electrode. The calibration was performed in the high purity hydrogen saturated 0.5 M  $\text{H}_2\text{SO}_4$  electrolyte with a Pt wire as the working electrode. The long-term stability test was measured at a constant voltage over the duration of 6000 s.

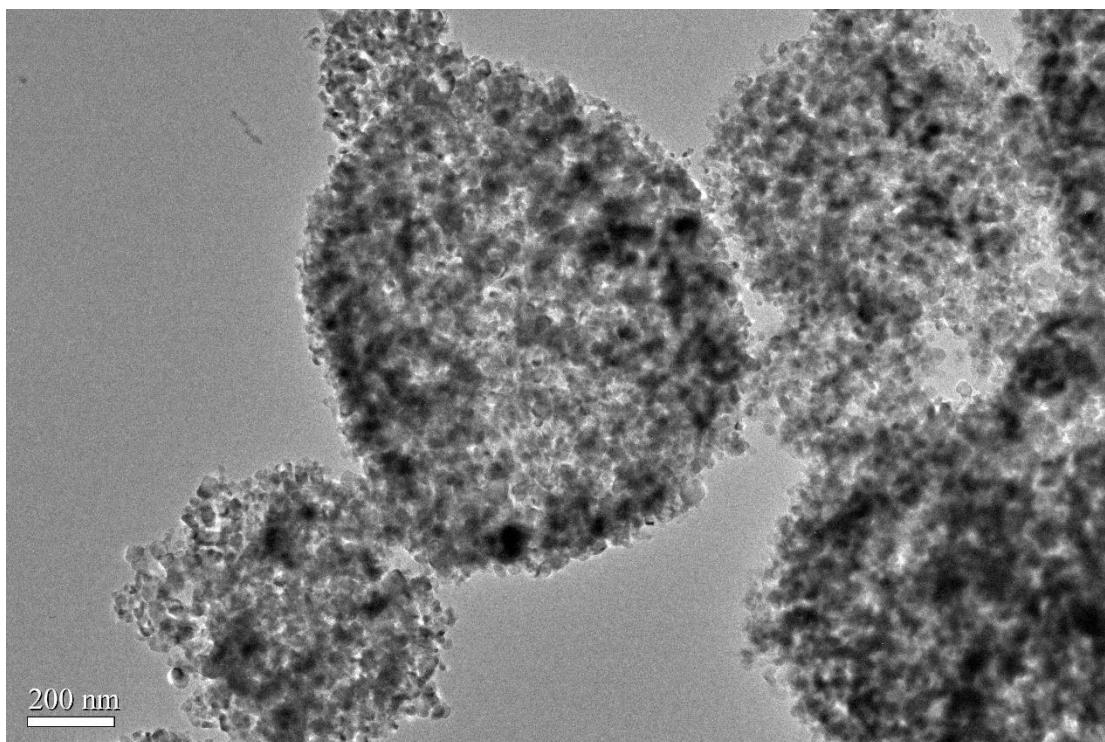

**Fig. S1.** TEM images of the pristine Co<sub>x</sub>P nanoparticles.

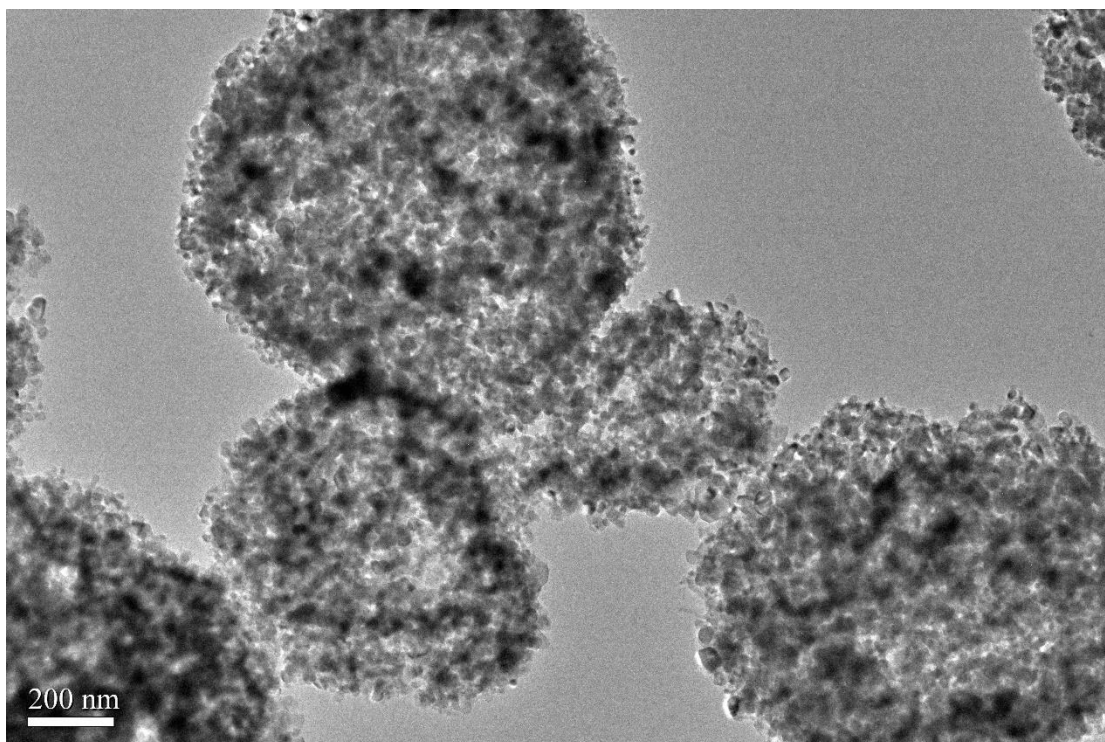

**Fig. S2.** TEM images of the pristine  $\text{Co}_x\text{P}$  nanoparticles.

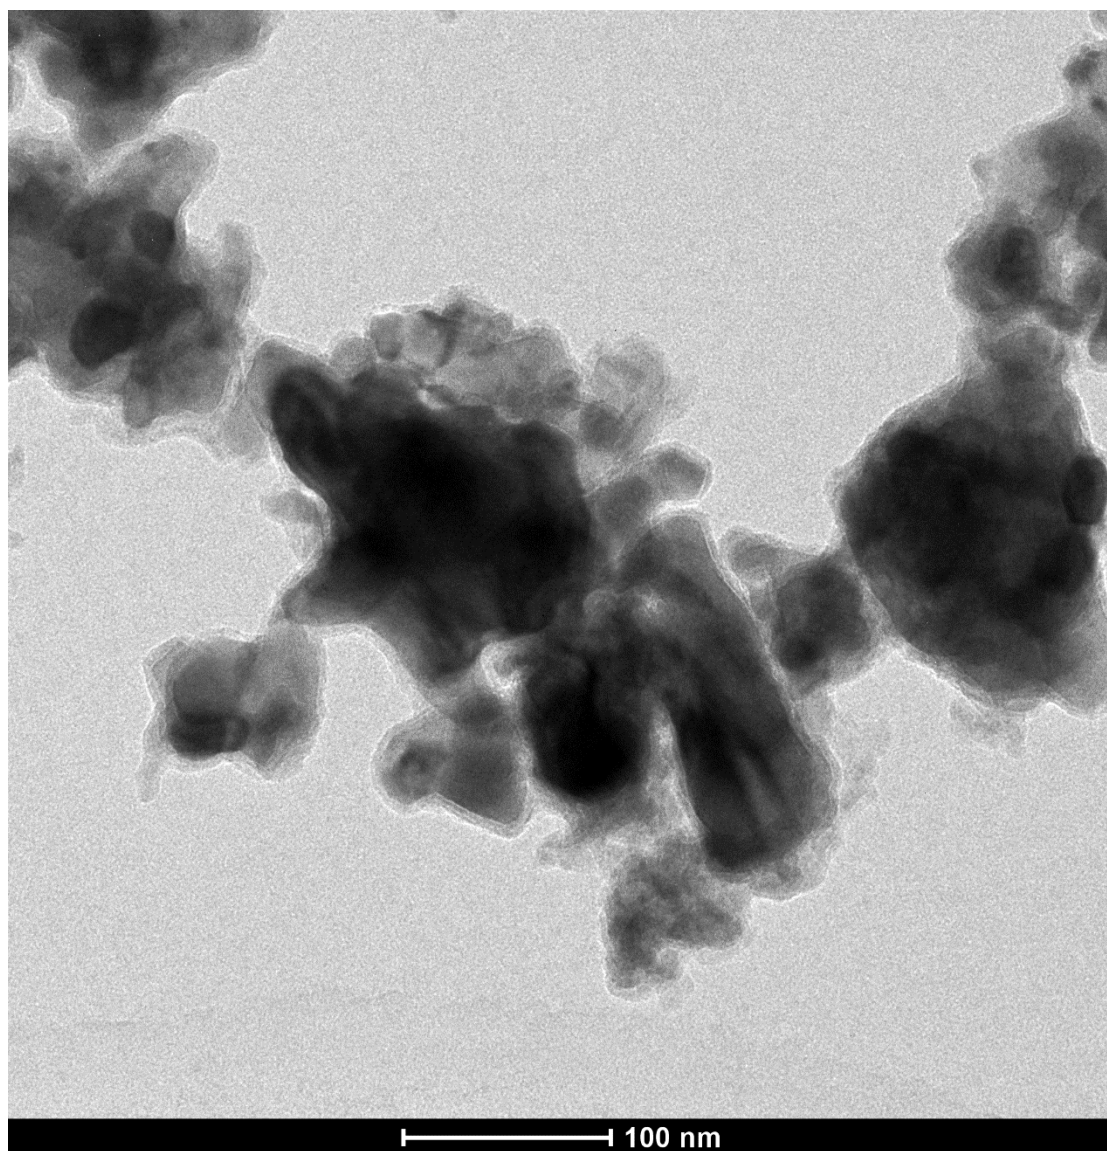

**Fig. S3.** TEM images of the hydrogenated Co<sub>x</sub>P nanoparticles.

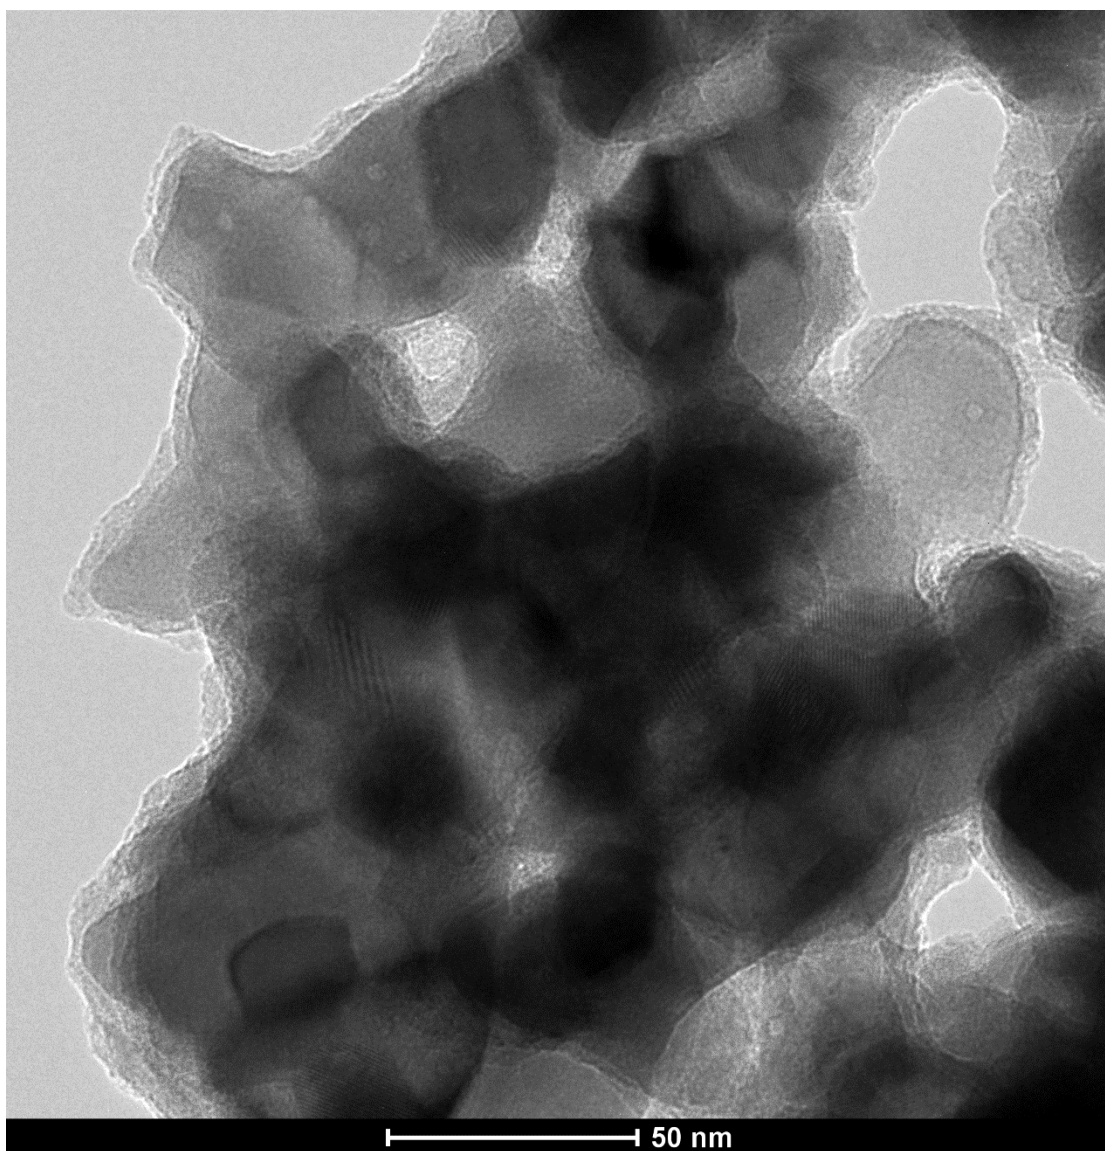

**Fig. S4.** TEM images of the hydrogenated Co<sub>x</sub>P nanoparticles.

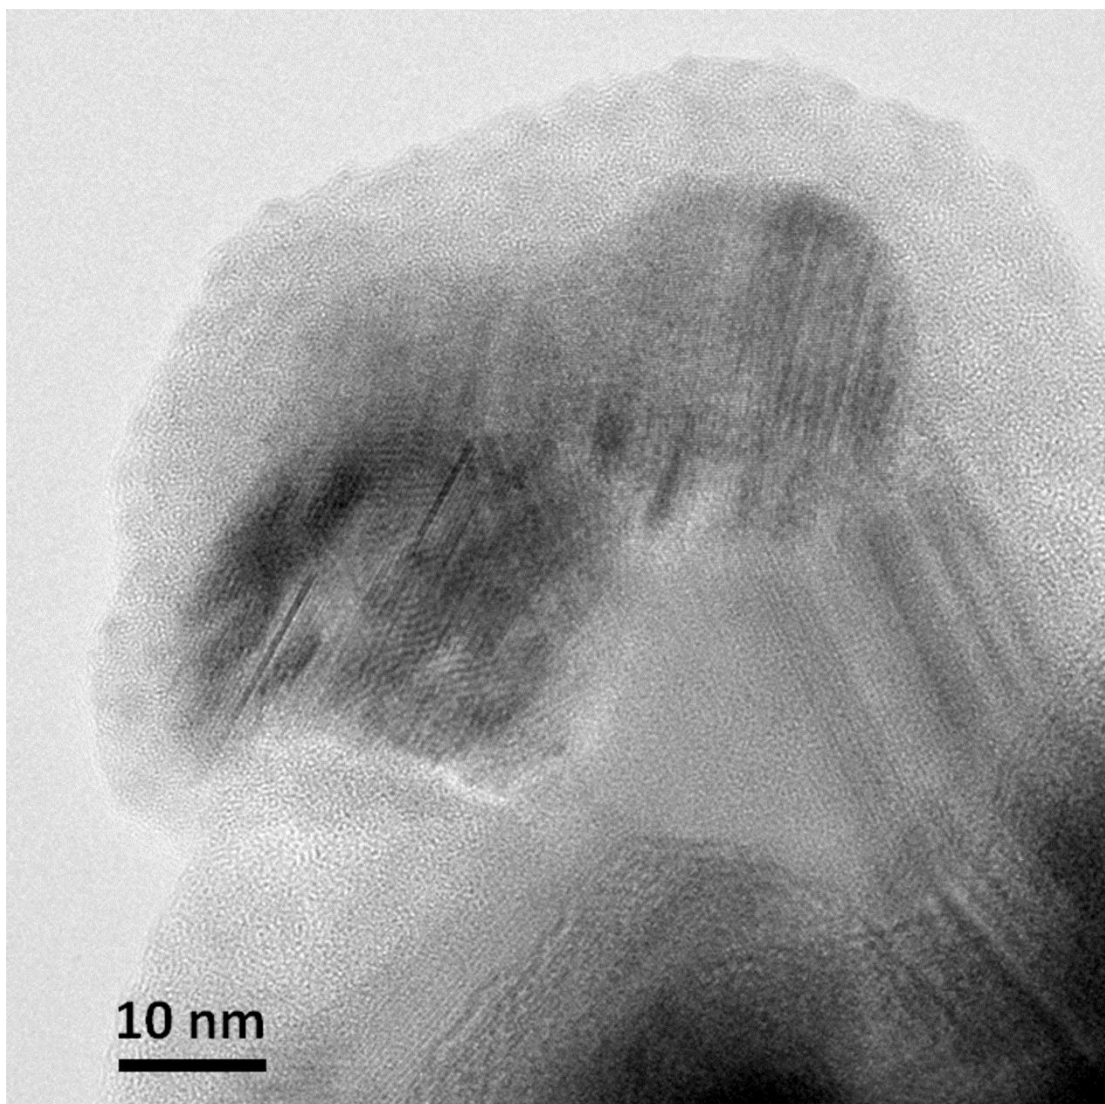

**Fig. S5.** HRTEM images of the hydrogenated  $\text{Co}_x\text{P}$  nanoparticles.



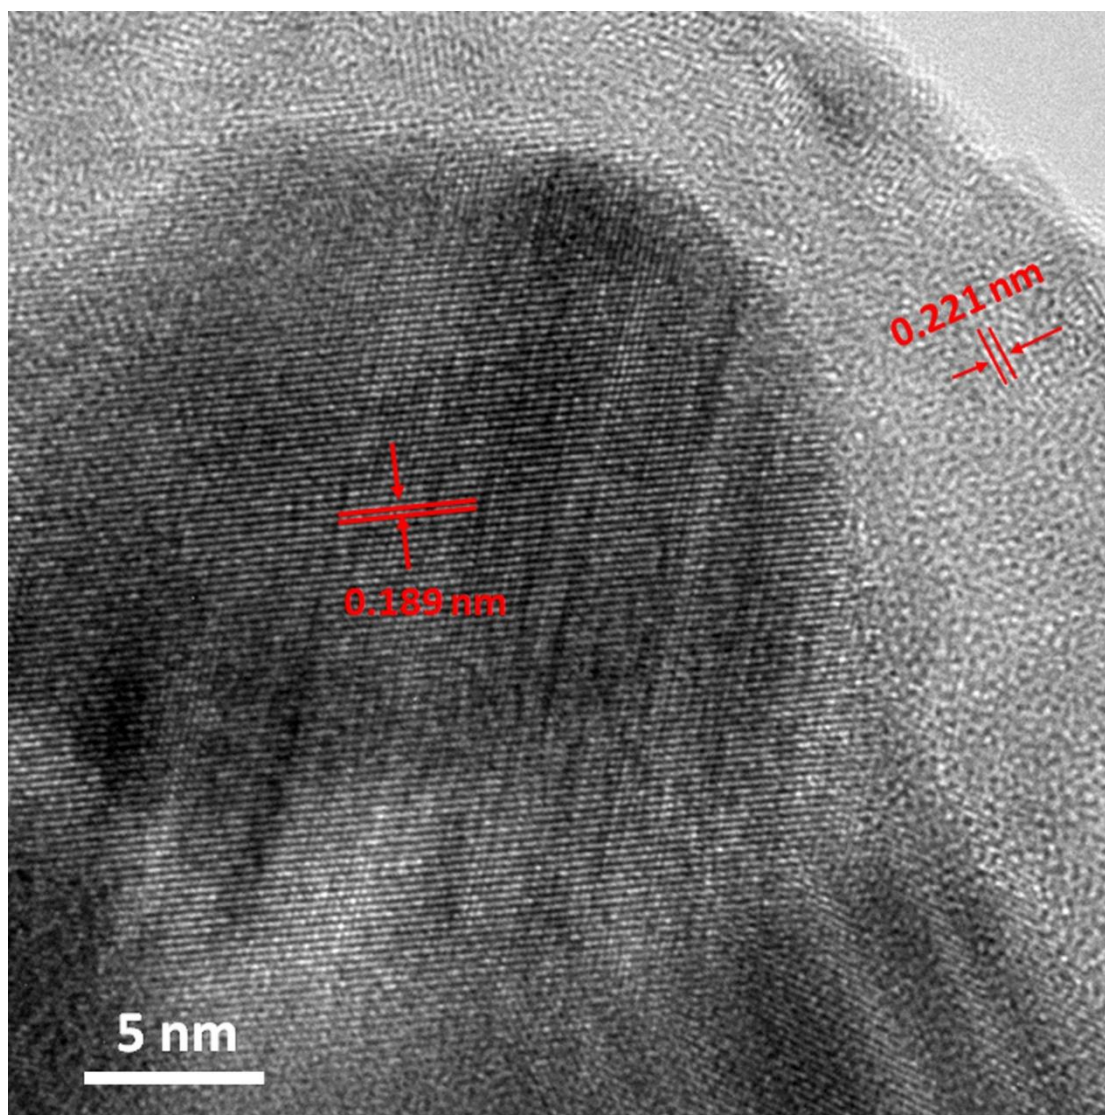

**Fig. S6.** HRTEM images of the hydrogenated  $\text{Co}_x\text{P}$  nanoparticles.

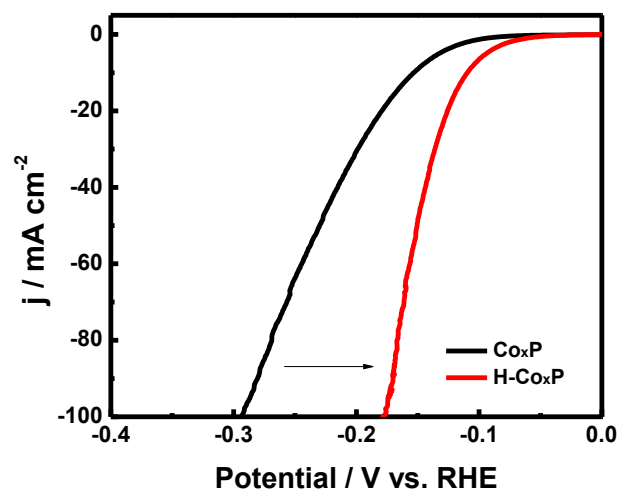

**Fig. S7.** Comparison of the polarization curves of the pristine and hydrogenated Co<sub>x</sub>P (H-Co<sub>x</sub>P) nanoparticles using a graphite electrode as the counter electrode.

**Table S1.** Comparison of the various HER catalysts at a current density of 10 mA cm<sup>-2</sup> in 0.5 M H<sub>2</sub>SO<sub>4</sub>.

| Catalyst                               | Electrolyte                          | $\eta_{10}$ (mV) | Ref       |
|----------------------------------------|--------------------------------------|------------------|-----------|
| H-Co <sub>x</sub> P                    | 0.5 M H <sub>2</sub> SO <sub>4</sub> | 110              | This work |
| Porous Co <sub>2</sub> P/CoP           | 0.5 M H <sub>2</sub> SO <sub>4</sub> | 150              | 14a       |
| Co <sub>2</sub> P                      | 0.5 M H <sub>2</sub> SO <sub>4</sub> | 134              | 13        |
| CoP/carbon cloth                       | 0.5 M H <sub>2</sub> SO <sub>4</sub> | 67               | 14e       |
| CoP/carbon                             | 0.5 M H <sub>2</sub> SO <sub>4</sub> | 122              | 14c       |
| Porous FeP                             | 0.5 M H <sub>2</sub> SO <sub>4</sub> | 240              | 16        |
| MoP                                    | 0.5 M H <sub>2</sub> SO <sub>4</sub> | 140              | 17        |
| W <sub>2</sub> P                       | 0.5 M H <sub>2</sub> SO <sub>4</sub> | 161              | 18        |
| Cu <sub>3</sub> P                      | 0.5 M H <sub>2</sub> SO <sub>4</sub> | 143              | 26        |
| N,P-doped graphene                     | 0.5 M H <sub>2</sub> SO <sub>4</sub> | 420              | 27        |
| MoS <sub>2</sub>                       | 0.5 M H <sub>2</sub> SO <sub>4</sub> | 215              | 28        |
| MoS <sub>x</sub>                       | 1.0 M H <sub>2</sub> SO <sub>4</sub> | 215              | 29        |
| MoS <sub>x</sub> -graphene             | 0.5 M H <sub>2</sub> SO <sub>4</sub> | 180              | 30        |
| WS <sub>2</sub>                        | 0.5 M H <sub>2</sub> SO <sub>4</sub> | 220              | 31        |
| WSe <sub>2</sub>                       | 0.5 M H <sub>2</sub> SO <sub>4</sub> | 230              | 32        |
| CoSe <sub>2</sub>                      | 0.5 M H <sub>2</sub> SO <sub>4</sub> | 193              | 33        |
| MoS <sub>2(1-x)</sub> Se <sub>2x</sub> | 0.5 M H <sub>2</sub> SO <sub>4</sub> | 161              | 34        |
| WS <sub>2(1-x)</sub> Se <sub>2x</sub>  | 0.5 M H <sub>2</sub> SO <sub>4</sub> | 260              | 35        |
